# Supplementary material
Source: MDPI journal article supplement (https://www.mdpi.com/1999-4907/9/3/125)
Supplement: s1 [file s1]

## Supplementary Materials.

Policy domains and documents included in the prioritisation exercise with

| A. Competition Policies        |                                                                                                                                                                                                                                                                                         |
|--------------------------------|-----------------------------------------------------------------------------------------------------------------------------------------------------------------------------------------------------------------------------------------------------------------------------------------|
| 1.                             | Antitrust Regulations (Regulation (EC) No 1/2003; 411/2004; 773/2004; 1419/2006; COM/2014/453)                                                                                                                                                                                          |
| 2.                             | Merger Regulations (Regulation (EC) No 139/2004; No.802/2004; 1269/2013;)                                                                                                                                                                                                               |
| 3.                             | Revised State aid guidelines (financial compensation for indirect emissions) (SWD/2012/131)                                                                                                                                                                                             |
| 4.                             | Guidelines on state aid for rescuing and restructuring firms in difficulty (2004/C 244)                                                                                                                                                                                                 |
| 5.                             | Draft guidelines on state aid for rescuing and restructuring non-financial undertakings in difficulty (COM/2013/Draft)                                                                                                                                                                  |
| 6.                             | State Aid Modernisation (SAM) (Resolution 2012/2920(RSP); COM/2012/209)                                                                                                                                                                                                                 |
| 7.                             | Guidelines on national regional aid (2013/C 209/01; 2006/C 54/08)                                                                                                                                                                                                                       |
| 8.                             | Guidelines on state aid for environmental protection 2014-2020 (2008/C 82/01)                                                                                                                                                                                                           |
| 9.                             | Draft Guidelines on environmental and energy State aid for 2014-2020 (COM/2013/Draft)                                                                                                                                                                                                   |
| 10.                            | Guidelines for state aid in the agriculture and forestry sector and in rural areas 2014-2020 (2014/C 204/01; 2006/C 319/01; Regulation (EU) No 702/2014; 1408/2013)                                                                                                                     |
| B. Climate and Energy Policies |                                                                                                                                                                                                                                                                                         |
| 11.                            | EU Emissions Trading System (Decision No 1359/2013/EU; Directive 2009/29/EC; Directive 2003/87/EC; 96/61/EC)                                                                                                                                                                            |
| 12.                            | Reform of the European carbon market (COM/2014/20)                                                                                                                                                                                                                                      |
| 13.                            | Auctioning of greenhouse gas emission allowances (Regulation (EU) No 176/2014; Regulation (EU) No 1031/2010)                                                                                                                                                                            |
| 14.                            | Carbon leakage list 2010-2014 (Decision 2010/2/EU; 2014/9/EU)                                                                                                                                                                                                                           |
| 15.                            | Carbon leakage list 2015-2019 (Draft Decision 2014/XXX )                                                                                                                                                                                                                                |
| 16.                            | Carbon leakage list 2020-2024 (Stakeholder consultation process on Post-2020 carbon leakage provisions for the EU Emissions trading system. Note 15/04/2014)                                                                                                                            |
| 17.                            | Harmonised free allocation of emission allowances (Decision 2011/278/EU)                                                                                                                                                                                                                |
| 18.                            | Standard capacity utilisation factor (Decision 2013/447/EU)                                                                                                                                                                                                                             |
| 19.                            | Monitoring and reporting of greenhouse gas emissions (Regulation (EU) No 601/2012)                                                                                                                                                                                                      |
| 20.                            | Effort Sharing Decision (Decision No 406/2009/EC; (Kyoto protocol - Decision 2002/358/EC))                                                                                                                                                                                              |
| 21.                            | Renewable Energy Directive (Directive 2009/28/EC; 2001/77/EC; 2003/30/EC; COM/2006/848, etc)                                                                                                                                                                                            |
| 22.                            | Proposal for a new RES directive - amending Directive 98/70/EC relating to the quality of petrol and diesel fuels and amending Directive 2009/28/EC on the promotion of the use of energy from renewable sources (COM/2012/595)                                                         |
| 23.                            | Geological storage of CO <sub>2</sub> (CCS Directive) (Directive 2009/31/EC)                                                                                                                                                                                                            |
| 24.                            | Policy framework for climate and energy in the period from 2020 to 2030 (COM/2014/15)                                                                                                                                                                                                   |
| 25.                            | Roadmap for moving to a low-carbon economy in 2050 (COM/2011/112)                                                                                                                                                                                                                       |
| 26.                            | Energy Roadmap 2050 (COM/2011/885)                                                                                                                                                                                                                                                      |
| 27.                            | Energy Efficiency Directive (Directive 2013/12/EU; Directive 2012/27/EC)                                                                                                                                                                                                                |
| 28.                            | Promotion of cogeneration based on a useful heat demand in the internal energy market (Directive 2004/8/EC, amending Directive 92/42/EEC on efficiency requirements for new hot-water boilers fired with liquid or gaseous fuels (repealed by the Energy Efficiency Directive in 2014)) |
| 29.                            | Implementing the Energy Efficiency Directive (COM/2013/762)                                                                                                                                                                                                                             |
| 30.                            | Energy Efficiency Plan 2011 (COM/2011/109)                                                                                                                                                                                                                                              |
| 31.                            | Third Energy Package                                                                                                                                                                                                                                                                    |
| 32.                            | Common rules for the internal market in electricity (Directive 2009/72/EC; 2003/54/EC)                                                                                                                                                                                                  |
| 33.                            | Common rules for the internal market in natural gas (Directive 2009/73/EC; 2003/55/EC)                                                                                                                                                                                                  |
| 34.                            | Conditions for access to the natural gas transmission networks (Regulation (EC) No 715/2009; 1775/2005)                                                                                                                                                                                 |

35. Conditions for access to the network for cross-border exchanges in electricity (Regulation (EC) No 714/2009; 1228/2003)
36. Energy prices and costs in Europe (COM(2014) 21; SWD(2014) 20)
37. Making the internal energy market work (COM/2012/663)
38. Energy Taxation Directive (Directive 2003/96/EC)
39. Proposal for a new Energy Taxation Directive (COM/2011/169)
40. Fuel Quality Directive (Directive 2009/30/EC; 98/70/EC)
41. Report on indirect land-use change related to biofuels and bioliquids (COM/2010/811)
42. Report on sustainability requirements for the use of solid and gaseous biomass sources in electricity, heating and cooling (COM/2010/11)
43. Land Use, Land Use Change and Forestry (LULUCF) (Decision No 529/2013/EU; COM/2012/93; COM/2012/94; SWD/2012/41.)
44. Resource Efficient Europe (flagship initiative of the Europe 2020 strategy) (COM/2011/21)
45. Roadmap to a Resource Efficient Europe (COM/2011/571)
46. Biomass action plan (COM/2005/628)
47. General rules for the granting of Community Financial aid in the field of trans-European transport and energy networks (TEN Financial Regulation, Regulation (EC) No 680/2007)

### **C. Environmental Policies**

48. Thematic Strategy on the sustainable use of natural resources (COM/2005/670)
49. Thematic programme for environment and sustainable management of natural resources including energy (COM/2006/20)
50. Our life insurance, our natural capital: an EU biodiversity strategy to 2020 (COM/2011/244)
51. Enhancing Europe's Natural Capital (COM/2013/249)
52. Policy contributing to sustainable growth in Europe 2020 (COM/2011/17)
53. Natura 2000 (including Habitats Directive 92/43; Birds Directive 2009/147; Financing Natura 2000: Investing in Natura 2000: Delivering benefits for nature and people (SEC(2011) 1573))
54. LIFE+ (On the establishment of a Programme for the Environment and Climate Action (COM/2011/874); Regulation (EU) No 1293/2013 on the establishment of a Programme for the Environment and Climate Action)
55. Industrial Emissions Directive (Directive 2010/75/EU)
56. Titanium dioxide industrial waste (Directive 78/176/EEC)
57. Surveillance and monitoring of titanium dioxide waste (Directive 82/883/EEC)
58. Reduction of titanium dioxide industrial waste (Directive 92/112/EEC)
59. Reducing emissions of volatile organic compounds (VOCs) (Directive 1999/13/EC)
60. Waste incineration (Directive 2000/76/EC)
61. Integrated pollution prevention and control (IPPC Directive) (Directive 2008/1/EC)
62. Limitation of emissions of certain pollutants from large combustion plants (Directive 2001/80/EC)
63. Best Available Techniques References (BREFs)
64. Production of Pulp, Paper and Board (2014/687/EU)
65. Production of Wood-based Panels (Final draft - July 2014)
66. Waste Incineration (Reference document - August 2006)
67. Waste Treatment (Reference document - August 2006)
68. Surface Treatment using Organic Solvents (Reference document - August 2007)
69. Energy Efficiency (Reference document - February 2009)
70. Wood and Wood Products Preservation with Chemicals (Review just started)
71. Air Quality framework Directive (Directive 96/62/EC)
72. National Emission Ceilings (NEC) (Directive 2001/81/EC)
73. Ambient air quality and cleaner air for Europe (Directive 2008/50/EC)
74. Fourth Daughter Directive (Directive 2004/107/EC)
75. Clean Air Policy Package (COM/2013/918)

76. Proposal Directive on reduction of national emissions of certain atmospheric pollutants (COM/2013/920)
77. Proposal Directive on the limitation of emissions of certain pollutants into the air from medium combustion plants (COM/2013/919)
78. Proposal Decision on the acceptance of the Amendment to the 1999 Protocol to the 1979 Convention on Long-Range Transboundary Air Pollution to Abate Acidification, Eutrophication and Ground-level Ozone (COM/2013/917)
79. Waste Framework Directive (Directive 2008/98/EC)
80. Packaging and Packaging Waste Directive (Directive 94/62/EC)
81. Proposal for a new Packaging and Packaging Waste Directive (COM/2013/761)
82. Proposal for amending Directives 2008/98/EC on waste, 94/62/EC on packaging and packaging waste, 1999/31/EC on the landfill of waste, 2000/53/EC on end-of-life vehicles, 2006/66/EC on batteries and accumulators and waste batteries and accumulators, and 2012/19/EU on waste electrical and electronic equipment (COM/2014/397)
83. Waste electrical and electronic equipment (Directive 2012/19/EU; 2002/95/EC)
84. Restriction of the use of certain hazardous substances in electrical and electronic equipment (Directive 2011/65/EU)
85. Restriction of Hazardous Substances (Directive 2002/95/EC)
86. Towards a circular economy: A zero waste programme for Europe (COM/2014/398)
87. Landfill of waste (Directive 99/31/EC)
88. Implementation of Directive 1999/31/EC on the landfill of waste (Decision 2000/738/EC)
89. Criteria and procedures for the acceptance of waste at landfills (Decision 2003/33/EC)
90. Water Framework Directive (Directive 2000/60/EC)
91. Waste Water Treatment Directive (Directive 91/271/EEC)
92. Quality of drinking water (Directive 98/83/EC)
93. Pricing and long-term management of water (COM/2000/477)
94. Droughts and water scarcity (COM/2007/414)
95. Strategy for sustainable development (COM/2001/264)
96. Mainstreaming sustainable development into EU policies (COM/2009/400)
97. A programme for clean and competitive SMEs (COM/2007/379)
98. Promoting corporate social responsibility (COM/2006/136)
99. Global partnership for sustainable development (COM/2002/82)
100. Persistent Organic Pollutants (Regulation 756/2010; 757/2010)
101. Decorative Paints Directive (Directive 2004/42/EC)
102. Environment Action Programme to 2020 (Decision No 1386/2013/EU)

#### **D. Forest-focused Policies**

103. EU Forest Strategy (COM/2013/0659; COM/1998/649)
104. EU Timber Regulation (Regulation (EU) No 995/2010)
105. FLEGT Regulation (Regulation (EC) No 1024/2008; 2173/2005)
106. EU Forest Action Plan (COM(2006) 302)
107. Prohibiting the marketing of specified forest reproductive materials to end-users (Regulation No 1602/2002)
108. Rules for the definition of small quantities of seed (Regulation No 2301/2002)
109. Proposal for a regulation on the production and making available on the market of plant reproductive material (plant reproductive material law). (COM/2013/0262)
110. Organic production and labelling of organic products (Regulation No 834/2007)
111. Protective measures against the introduction of organisms harmful to plants or plant products and against their spread (Directive 2000/29/EC; 2005/15/EC)
112. Addressing the challenges of deforestation and forest degradation to tackle climate change and biodiversity loss. (COM/2008/645)
113. Reducing emissions from deforestation and forest degradation, conservation of forest carbon stocks, sustainable management of forests, and enhancement of forest carbon stocks (REDD+) (Council Conclusions 6810/12)
114. European Regional Development Fund (ERDF) (Regulation (EU) No 1301/2013; 1303/2013)

- 115. Support for rural development by the European Agricultural Fund for Rural Development (EAFRD) (Regulation (EU) No 1305/2013)
- 116. Financing, management and monitoring of the common agricultural policy (Regulation (EU) No 1306/2013)
- 117. Establishing rules for direct payments to farmers under support schemes within the framework of the common agricultural policy (Regulation (EU) No 1307/2013)
- 118. Laying down the multiannual financial framework for the years 2014-2020 (Regulation (EU) No 1311/2013)

#### **E. Industry and Other Policies**

- 119. Europe 2020: A strategy for smart, sustainable and inclusive growth (COM/2010/2020)
- 120. An integrated industrial policy for the globalisation era (flagship initiative of the Europe 2020 strategy) (COM/2010/614)
- 121. For a European Industrial Renaissance (COM/2014/14)
- 122. Cohesion Fund (Regulation (EU) No 1300/2013)
- 123. Territorial cooperation (EGTC) (Regulation (EU) No 1302/2013)
- 124. European Social Fund (Regulation (EU) No 1304/2013)
- 125. European Research Area (COM/2012/392)
- 126. A blueprint for the EU Forest-based Industries (woodworking, furniture, pulp & paper manufacturing and converting, printing) (SWD/2013/343)
- 127. Innovative and sustainable forest-based industries in the EU - A contribution to the EU's growth and jobs strategy (COM/2008/113)
- 128. Innovation Union (flagship initiative of the Europe 2020 strategy) (COM/2010/546)
- 129. Establishing a financing instrument for development cooperation (Regulation No 1905/2006)
- 130. Integrating sustainable development into Community cooperation policy (COM/2000/264)
- 131. The raw materials initiative - meeting our critical needs for growth and jobs in Europe (COM/2008/699)
- 132. Innovating for Sustainable Growth: A Bioeconomy for Europe (COM/2012/60)
- 133. Regional Policy contributing to smart growth in Europe 2020 (COM/2010/553)

#### **F. Employment Policies**

- 134. Working Time Directive (Directive 2003/88/EC)
- 135. Reviewing the Working Time Directive (second-phase consultation) (COM/2010/801)
- 136. Health and safety at work – general rules (e.g. Directive 2007/30/EC, etc.)
- 137. Introduction of measures to encourage improvements in the safety and health of workers at work (Directive 89/391/EEC)
- 138. Directive on Personal Protective Equipment (Directive 89/686/EEC)
- 139. Minimum safety and health requirements for the use by workers of personal protective equipment at the workplace (Directive 89/656/EEC)
- 140. Minimum safety and health requirements for the workplace (Directive 89/654/EEC)
- 141. Minimum safety and health requirements for the manual handling of loads where there is a risk particularly of back injury to workers (Directive 90/269/EEC)
- 142. Practical implementation of directives on health and safety at work (COM/2004/62)
- 143. Minimum safety and health requirements for the manual handling of loads where there is a risk particularly of back injury to workers (Directive 90/269/EEC)
- 144. Minimum safety and health requirements for work with display screen equipment (Directive 90/270/EEC)
- 145. Minimum safety and health requirements for improved medical treatment on board vessels (Directive 92/29/EEC)
- 146. Minimum requirements for the provision of safety and/or health signs at work (Directive 92/58/EEC)
- 147. Minimum safety and health requirements at temporary or mobile construction sites (Directive 92/57/EEC)
- 148. Protection of the health and safety of workers from the risks related to chemical agents at work (Directive 98/24/EC)

149. Minimum requirements for improving the safety and health protection of workers potentially at risk from explosive atmospheres (Directive 1999/92/EC)
150. First list of indicative occupational exposure limit values, on the protection of the health and safety of workers from the risks related to chemical agents at work (Directive 2000/39/EC)
151. Minimum safety and health requirements regarding the exposure of workers to the risks arising from physical agents (vibration) (Directive 2000/44/EC)
152. Minimum safety and health requirements regarding the exposure of workers to the risks arising from physical agents (noise) (Directive 2003/10/EC)
153. Second list of indicative occupational exposure limit values (Directive 2006/15/EC)
154. Minimum safety and health requirements for the use of work equipment by workers at work (Directive 2009/104/EC)
155. Protection of workers from the risks related to exposure to asbestos at work (Directive 2009/148/EC)
156. Third list of indicative occupational exposure limit values (Directive 2009/161/EC)
157. Minimum safety and health requirements regarding the exposure of workers to risks arising from physical agents (electromagnetic fields) (Directive 2013/35/EU)
158. Directive on classification, labelling and packaging of substances and mixtures (CLP Regulation) (Directive 2014/27/EU)
159. Roadmap for equality between women and men 2006-2010 (COM/2006/92)
160. Coordination of social security systems (Regulation 883/2004)
161. Collective redundancies (Directive 98/59/EC)
162. Protection of employees in the event of the insolvency of their employer (Directive 2008/94/EC)
163. Obligation to inform employees of applicable working conditions (Directive 91/533/EEC)
164. Safeguarding employees' rights in the event of transfers of undertakings (Directive 2001/23/EC)

## **G. Product Policies**

165. Public works contracts, public supply contracts and public service contracts (Directive 2004/18/EC)
166. Procurement procedures of entities operating in the water, energy, transport and postal services sectors (Directive 2004/17/EC)
167. Public procurement for a better environment (COM/2008/400; SEC/2008/2126; SEC/2008/2124; Council conclusions 13067/08 & 16914/08.)
168. Single market act I & II (COM/2011/0206; COM/2012/573)
169. Commission Recommendation on the use of common methods to measure and communicate the life cycle environmental performance of products and organisations (2013/179/EU))
170. Building the Single Market for Green Products Facilitating better information on the environmental performance of products and organisations (COM/2013/196)
171. Content in the Digital Single Market (COM/2012/789)
172. Single Market for Intellectual Property Rights (COM/2011/287)
173. EU Ecolabel (Regulation No 880/92; 1980/2000; 66/2010)
174. Eco-label for wooden floor coverings (2010/18/EC)
175. Eco-label for wooden furniture (2009/894/EC)
176. Eco-label for converted paper products (2014/256/EU)
177. Eco-label for newsprint paper (2012/448/EU)
178. Eco-label for printed paper (2012/481/EU)
179. Eco-label for copying and graphic paper (2011/333/EU)
180. Eco-label for tissue paper (2009/568/EC)
181. Eco-label for bed mattresses (2014/391/EU)
182. Eco-label for absorbent hygiene products (2014/763/EU)
183. Ecodesign Directive (Regulation 2009/125/EC; 2008/28/EC; 2005/32/EC; 96/57/EC; 92/42/EEC)
184. Ecodesign Working Plans 2012-2014 (SWD(2012) 434 final)
185. Ecodesign Working Plans 2009-2011 (COM/2008/660)

|      |                                                                                                                                                                                                      |
|------|------------------------------------------------------------------------------------------------------------------------------------------------------------------------------------------------------|
| 186. | Implementing Regulations (e.g. Power transformers (Regulation (EU) No 548/2014) & Water pumps (Regulation (EU) No 547/2012), etc.)                                                                   |
| 187. | Energy Labelling Directive (Directive 2010/30/EU)                                                                                                                                                    |
| 188. | Implementing regulations (e.g. Heaters (Regulation (EU) No 811/2013) & Lamps (Regulation (EU) No 874/2012), etc.)                                                                                    |
| 189. | Construction Products Regulation (CPR) (Regulation (EU) No 305/2011; 89/106/EEC.)                                                                                                                    |
| 190. | Energy performance of buildings (Regulation (EU) No 244/2012; Directive 2010/31/EU; Directive 2002/91/EC. )                                                                                          |
| 191. | Strategy for the sustainable competitiveness of the construction sector and its enterprises (COM/2012/433)                                                                                           |
| 192. | Resource efficiency opportunities in the building sector (COM/2014/445)                                                                                                                              |
| 193. | Data Protection Directive (Directive 95/46/EC)                                                                                                                                                       |
| 194. | Reform of Data Protection Legislation (COM/2012/09; COM/2012/010; COM/2012/11.)                                                                                                                      |
| 195. | General product safety (Directive 2001/95/EC; 2014/C 220/02; 87/357/EEC.)                                                                                                                            |
| 196. | Proposal for a regulation on consumer product safety (COM/2013/78)                                                                                                                                   |
| 197. | Framework Regulation on materials and articles intended to come into contact with food (Regulation EC 1935/2004)                                                                                     |
| 198. | Good Manufacturing Practice for materials and articles intended to come in contact with food (Regulation EC 2023/2006)                                                                               |
| 199. | Materials and articles made of regenerated cellulose film intended to come into contact with foods (Directive 2007/42/EC)                                                                            |
| 200. | Digital Agenda for Europe (COM/2010/245)                                                                                                                                                             |
| 201. | Digital growth (COM/2012/784;)                                                                                                                                                                       |
| 202. | Electronic invoicing (end-to-end e-procurement) (COM/2013/453; COM/2013/449; COM/2010/712.)                                                                                                          |
| 203. | Strategy for e-procurement (COM/2012/179)                                                                                                                                                            |
| 204. | Registration, Evaluation, Authorisation and Restriction of Chemicals (REACH) (Regulation (EC) No 1907/2006; 2013/505/EU (and all related legislation).)                                              |
| 205. | Biocidal Products Regulation (ECHA) (Regulation (EU) 528/2012)                                                                                                                                       |
| 206. | Copyright and related rights in the information society (Directive 2001/29/EC)                                                                                                                       |
| 207. | Copyright in the Knowledge Economy (COM/2009/532)                                                                                                                                                    |
| 208. | Unfair Commercial Practices (COM/2013/138; COM(2013)139; SEC/2009/1666; Directive 2005/29/EC;)                                                                                                       |
| 209. | Proposal for a Directive amending Council Directives 78/660/EEC and 83/349/EEC as regards disclosure of non-financial and diversity information by certain large companies and groups (COM/2013/207) |
| 210. | Simplifying the accounting requirements for small companies (Directive 2013/34/EU; 2006/43/EC; 83/349/EEC; 78/660/EEC.)                                                                              |
| 211. | Common system of value added tax (Directive 2006/112/EC; 2010/88/EU; )                                                                                                                               |
| 212. | Postal Policy Framework (Postal Directives) (Directive 97/67/EC; 2002/39/EC; 2008/6/EC)                                                                                                              |
| 213. | European Regulators Group for Postal Services (Decision 2010/C 217/07)                                                                                                                               |
| 214. | Unit Price Directive (Directive 98/6/EC; COM/2006/325 )                                                                                                                                              |
| 215. | Toys Safety Directive (Directive 2009/48/EC)                                                                                                                                                         |
| 216. | Ethanol denaturation (Regulation (EC) No 3199/9; 162/2013)                                                                                                                                           |
| 217. | Cosmetic Products (Regulation 1223/2009)                                                                                                                                                             |
| 218. | Unfair Commercial Practices Directive (Directive 2005/29/EC)                                                                                                                                         |

## H. Transport Policies

|      |                                                                                                                                     |
|------|-------------------------------------------------------------------------------------------------------------------------------------|
| 219. | Roadmap to a Single European Transport Area - Towards a competitive and resource efficient transport system (COM/2011/144)          |
| 220. | International transport of dangerous goods on land (Directive 2008/68)                                                              |
| 221. | Sulphur content of marine fuels (Directive 2012/33/EU; 1999/32/EC; 2005/33/EC)                                                      |
| 222. | Road safety: dimensions and maximum weights authorised for both national and international journeys (Directive 2002/7/EC; 96/53/EC) |
| 223. | Proposal for a new Road Safety Directive (COM/2013/195)                                                                             |
| 224. | Fourth Railway Package (COM/2013/25)                                                                                                |

- |      |                                                                                                                            |
|------|----------------------------------------------------------------------------------------------------------------------------|
| 225. | Technical roadside inspection of the roadworthiness of commercial vehicles circulating in the Union (Directive 2014/47/EU) |
| 226. | European Best Practice Guidelines for Abnormal Road Transports                                                             |
| 227. | European Best Practice Guidelines for Cargo Securing                                                                       |
| 228. | Waste Shipment (Regulation (EC) No 1013/2006)                                                                              |

## I. Trade Policies

- |      |                                                                                                                                                          |
|------|----------------------------------------------------------------------------------------------------------------------------------------------------------|
|      | Trade Defence Instruments                                                                                                                                |
| 229. | Anti-dumping (Regulation No 1225/2009)                                                                                                                   |
| 230. | Anti-subsidy (Regulation (EC) No 597/2009)                                                                                                               |
| 231. | Safeguards (against WTO members) (Regulation (EC) No 260/2009)                                                                                           |
| 232. | Safeguards (against non-WTO members) (Regulation (EC) No 625/2009)                                                                                       |
| 233. | Implementation of WTO rulings in EU law (Regulation (EC) No 1515/2001)                                                                                   |
| 234. | Generalised Scheme of Preferences (GSP) (Regulation (EC) No 732/2008; 512/2011; 978/2012.)                                                               |
| 235. | Tariffs related to F-BI material, semi-products and final products (SWD/2013/343)                                                                        |
| 236. | Markets in financial instruments - MiFID 1 (Directive 2004/39/EC)                                                                                        |
| 237. | Markets in financial instruments - MiFID 2 (Directive 2014/65/EU; Regulation 600/2014)                                                                   |
| 238. | Market abuse (market abuse regulation) (Regulation 596/2014)                                                                                             |
| 239. | Criminal sanctions for market abuse (market abuse directive) (Directive 2014/57/EU)                                                                      |
| 240. | Agreement on new European rules to regulate Financial Derivatives (EMIR) (Regulation (EU) No 648/2012)                                                   |
| 241. | Technical standards for the Regulation on OTC derivatives, central counterparties and trade repositories (e.g., Regulation 152/2013; 153/2013; 149/2013) |
| 242. | List of exempted entities under EMIR (Regulation 1002/2013)                                                                                              |
| 243. | Fees to be charged to trade repositories (Regulation 1003/2013)                                                                                          |
| 244. | Regulatory technical standards on colleges for central counterparties (Regulation 876/2013)                                                              |
| 245. | Rules of procedure for penalties imposed on trade repositories (Regulation 667/2014)                                                                     |
